# Supplementary material
Source: PubMed Central journal article supplement (PMC3460469)

## SUPPLEMENTAL FIGURE LEGENDS

**SUPPLEMENTAL FIGURE S1. Preconditioning hCSCs with CoPP does not alter the cells' ability to proliferate.** *A.* Immunostaining was performed in hCSCs preconditioned with or without CoPP after 48-hour BrdU incorporation. BrdU-positive cells were visualized with BrdU antibody staining. Scale bars: 100  $\mu$ m. *B.* BrdU assay with flow cytometry was performed to quantify the percentage of BrdU positive cells for the samples shown in (A). *C.* Quantitative analysis of the percentage of proliferative hCSCs that were preconditioned with or without CoPP after 48-hour BrdU incorporation. n.s., no significant difference. *D.* The viability of hCSCs treated with CoPP for 12 hours or not treated, followed by 48-hour recovery, was measured by the MTT assay. n.s., no significant difference.

**SUPPLEMENTAL FIGURE S2. Preconditioning hCSCs with CoPP does not alter the cells' ability to differentiate.** *A.* Cardiac differentiation was induced with  $10^{-8}$  M dexamethasone for 9 days in DMEM medium for different groups of hCSCs. Quantitative real time PCR was performed for the cardiac troponin I gene and the house keeping gene, GAPDAH, as normalized control. *B.* Western blotting assay was performed to confirm the differentiation of different groups of hCSCs with antibodies for a muscle-specific gene, MG53, and  $\alpha$ -tubulin as loading control.

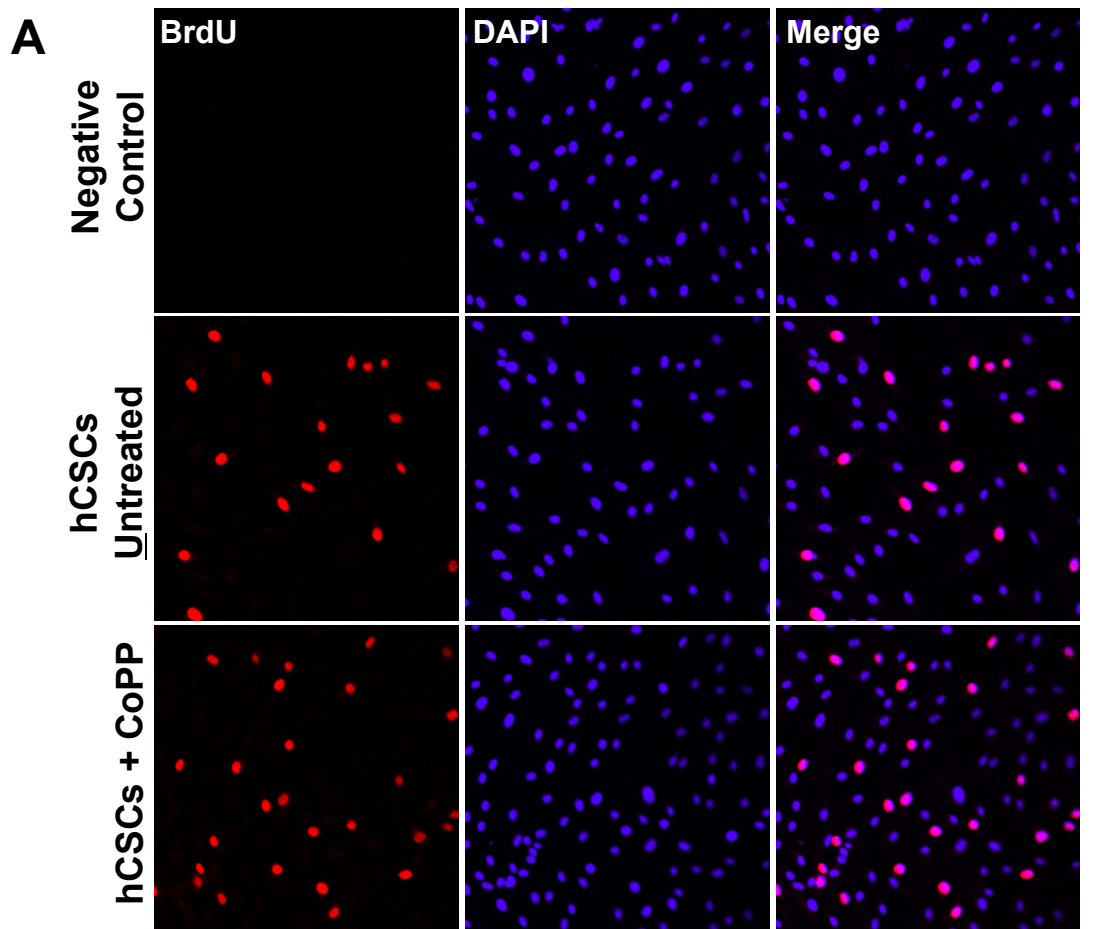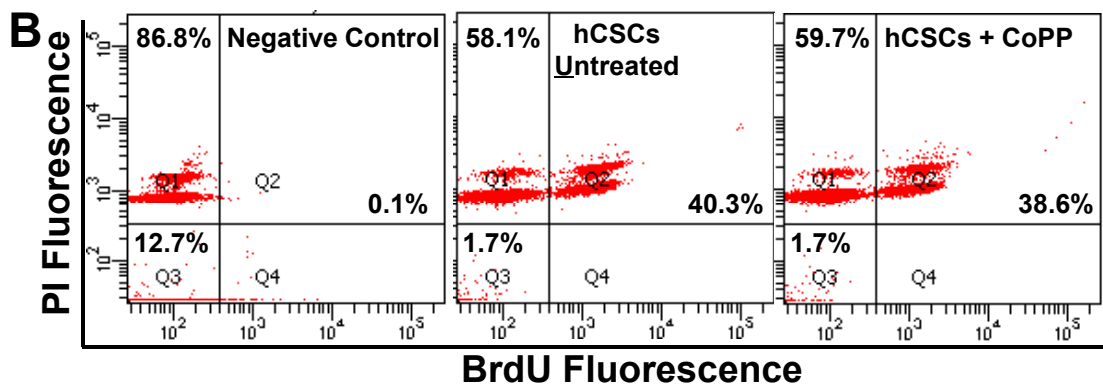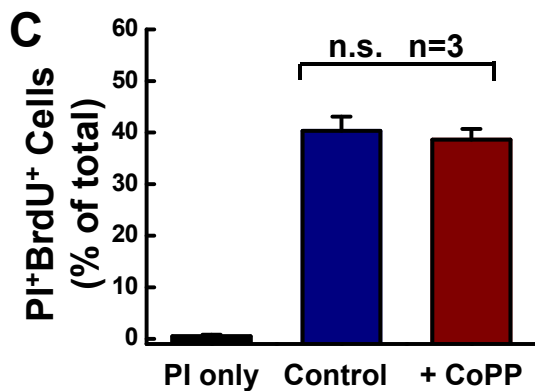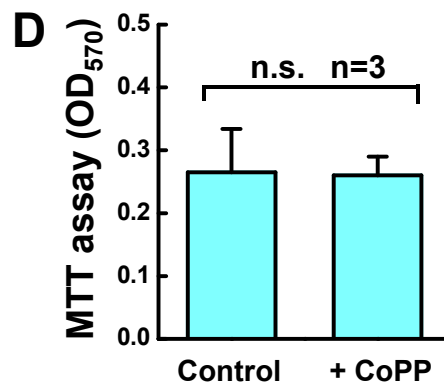

Supplemental Figure S1

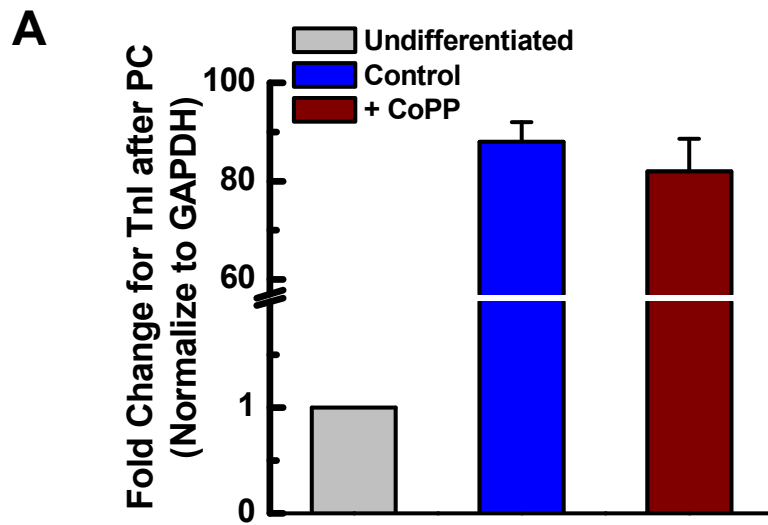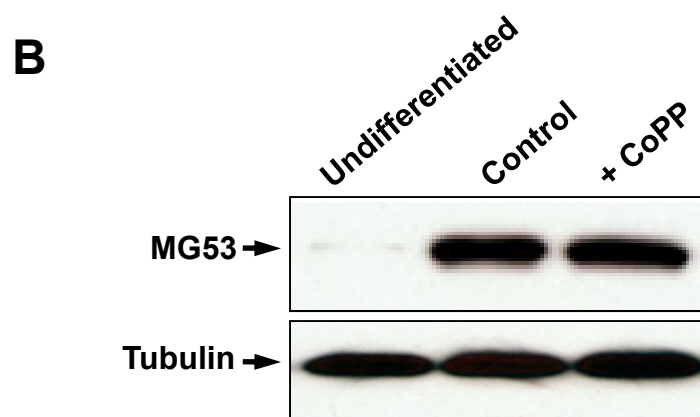

Supplement: supp_M112.385542_jbc.M112.385542-1.pdf [file supp_M112.385542_jbc.M112.385542-1.pdf]
